# Supplementary material for: Effects of three tebuconazole nanopesticides on the survival of Daphnia magna
Source: Royal Society of Chemistry journal article supplement (doi:10.1039/d3en00673e), 2024-01-01
Supplement: d3en00673e1.pdf [file d3en00673e1.pdf]

Supplementary information for

**EFFECTS OF THREE TEBUCONAZOLE NANOPESTICIDES ON THE SURVIVAL OF  
*DAPHNIA MAGNA***

Mahleh Eghbalinejad<sup>a</sup>, Rocío López-Cabeza<sup>ab</sup>, Jan Kotouček<sup>c</sup>, Renato Grillo<sup>d</sup>, Marek Koutný<sup>e</sup>, Zuzana Bílková<sup>a</sup>, Jakub Hofman<sup>a\*</sup>

<sup>a</sup>RECETOX, Faculty of Science, Masaryk University, Kamenice 753/5, Brno, 625 00, Czech Republic

<sup>b</sup>Instituto de Recursos Naturales y Agrobiología de Sevilla, (IRNAS), CSIC, Avenida de Reina Mercedes 10, 41012, Sevilla, Spain

<sup>c</sup>Department of Pharmacology and Toxicology, Veterinary Research Institute, Brno, Czech Republic

<sup>d</sup>Department of Physics and Chemistry, School of Engineering, São Paulo State University (UNESP), Ilha Solteira, SP, 15385-000, Brazil.

<sup>e</sup>Department of Environmental Protection Engineering, Faculty of Technology, Tomas Bata University, Vavrečkova 275, Zlín, 760 01, Czech Republic

\* Corresponding author: [jakub.hofman@recetox.muni.cz](mailto:jakub.hofman@recetox.muni.cz)

**Table S1:** Aachener Daphnien Medium (ADaM).

The medium is prepared by adding synthetic sea salt and analytical grade chemicals to deionized water, as compiled in Table S1. Subsequently, it is aerated for 12 h to guarantee air saturation. Synthetic sea salt contains 7 macronutrients, 60 trace elements, 8 vitamins, 3 amino acids, 1 hormone, and natural colloids. By adding  $\text{CaCl}_2$  and  $\text{NaHCO}_3$ , the total hardness (2-5 0-2mmol/L), the Ca: Mg ratio (4:1).<sup>1</sup>

| Compounds                                                                                      | Quantity  |
|------------------------------------------------------------------------------------------------|-----------|
| Synthetic sea salt (Wimex hw Meersalz Bioelemente)                                             | 0.333 g/L |
| $\text{CaCl}_2$ solution, 0.8 mol/L ~ (117.6 g L ~ $\text{CaCl}_2 \cdot 2\text{H}_2\text{O}$ ) | 2.3 ml/L  |
| $\text{NaHCO}_3$ solution, 0.3 mol/ L ~ (25.2 g L ~ $\text{NaHCO}_3$ )                         | 2.2 ml/L  |
| $\text{SeO}_2$ solution, 0.013 mol/ L ~ (1.4 g/L ~ $\text{SeO}_2$ )                            | 0.1 ml/L  |

**Table S2.** The total and free concentration (mg/L) of tebuconazole (TBZ) in poly- $\epsilon$ -caprolactone (PCL), after dilution in ADaM medium versus nominal (theoretical) concentration of TBZ at t=0 and t=48h. The values (in this table) are the mean  $\pm$  standard deviation (n=3).

|           | Nominal concentration<br>(mg/L) | Total concentration (mg/L) |                 | Free concentration (mg/L) |                  |
|-----------|---------------------------------|----------------------------|-----------------|---------------------------|------------------|
|           |                                 | t=0 h                      | t=48 h          | t=0 h                     | t= 48 h          |
| <b>C1</b> | 2.25                            | 2.16 $\pm$ 0.07            | 2.4 $\pm$ 0.2   | 1.9 $\pm$ 0.03            | 2.25 $\pm$ 0.10  |
| <b>C2</b> | 4.50                            | 4.2 $\pm$ 0.07             | 4.0 $\pm$ 0.2   | 3.40 $\pm$ 0.15           | 3.77 $\pm$ 0.50  |
| <b>C3</b> | 9.00                            | 8.10 $\pm$ 0.4             | 9.2 $\pm$ 0.3   | 6.12 $\pm$ 0.13           | 6.3 $\pm$ 0.20   |
| <b>C4</b> | 18.00                           | 17.46 $\pm$ 0.2            | 18.57 $\pm$ 0.8 | 7.2 $\pm$ 0.64            | 8.7 $\pm$ 0.20   |
| <b>C5</b> | 36.00                           | 33.37 $\pm$ 1.16           | 35.0 $\pm$ 1.5  | 9.39 $\pm$ 0.12           | 11.03 $\pm$ 0.70 |

**Table S3.** The total and free concentration (mg/L) of tebuconazole (TBZ) in nanostructured lipid carrier (NLC) after dilution in ADaM medium versus nominal (theoretical) concentration of TBZ at t=0 and t=48h. The values (in this table) are the mean  $\pm$  standard deviation (n=3).

|           | Nominal concentration<br>(mg/L) | Total concentration (mg/L) |                  | Free concentration (mg/L) |                   |
|-----------|---------------------------------|----------------------------|------------------|---------------------------|-------------------|
|           |                                 | t=0 h                      | t=48 h           | t=0 h                     | t= 48 h           |
| <b>C1</b> | 2.25                            | 2.02 $\pm$ 0.02            | 2.41 $\pm$ 0.07  | 2.05 $\pm$ 0.03           | 2.485 $\pm$ 0.05  |
| <b>C2</b> | 4.5                             | 3.75 $\pm$ 0.06            | 3.95 $\pm$ 0.40  | 3.845 $\pm$ 0.03          | 4.085 $\pm$ 0.03  |
| <b>C3</b> | 9                               | 7.94 $\pm$ 0.6             | 8.58 $\pm$ 0.40  | 7.65 $\pm$ 0.07           | 7.855 $\pm$ 0.05  |
| <b>C4</b> | 18                              | 15.95 $\pm$ 0.6            | 17.93 $\pm$ 0.60 | 12.45 $\pm$ 0.62          | 14.275 $\pm$ 0.66 |
| <b>C5</b> | 36                              | 30.48 $\pm$ 0.6            | 34.46 $\pm$ 1.50 | 19.85 $\pm$ 0.94          | 20.825 $\pm$ 0.41 |

**Table S4.** The total and free concentration (mg/L) of tebuconazole (TBZ) in poly(3-hydroxybutyrate) (PHB) after dilution in ADaM medium versus nominal (theoretical) concentration of TBZ. At t=0 and t=48h. The values (in this table) are the mean  $\pm$  standard deviation (n=2).

|           | Nominal concentration<br>(mg/L) | Total concentration (mg/L) |                   | Free concentration (mg/L) |                  |
|-----------|---------------------------------|----------------------------|-------------------|---------------------------|------------------|
|           |                                 | t=0 h                      | t=48 h            | t=0 h                     | t= 48 h          |
| <b>C1</b> | 2.25                            | 3.23 $\pm$ 0.35            | 2.07 $\pm$ 0.20   | 2.50 $\pm$ 0.10           | 2.07 $\pm$ 0.20  |
| <b>C2</b> | 4.5                             | 9.31 $\pm$ 0.33            | 4.48 $\pm$ 0.14   | 5.89 $\pm$ 0.10           | 4.30 $\pm$ 0.20  |
| <b>C3</b> | 9                               | 16.42 $\pm$ 1.94           | 10.42 $\pm$ 1.21  | 10.50 $\pm$ 0.70          | 10.60 $\pm$ 0.60 |
| <b>C4</b> | 18                              | 34.30 $\pm$ 1.98           | 23.96 $\pm$ 6.38  | 14.70 $\pm$ 0.20          | 19.70 $\pm$ 0.70 |
| <b>C5</b> | 36                              | 180.93 $\pm$ 58.49         | 62.04 $\pm$ 10.39 | 22.13 $\pm$ 0.60          | 27.10 $\pm$ 1.60 |

## Reference

1. Klittigen, B., Dulmer, U., Engels, M., & Ratre, H. T. (1994). Rapid Communication Adam, an Artificial Freshwater for the Culture of Zooplankton. *Science*, 28(3), 743–746.
